# Supplementary material for: WIF1 prevents Wnt5A mediated LIMK/CFL phosphorylation and adherens junction disruption in human vascular endothelial cells
Source: Springer Nature journal article supplement (doi:10.1186/s12950-017-0157-4), 2017-05-19

**none**

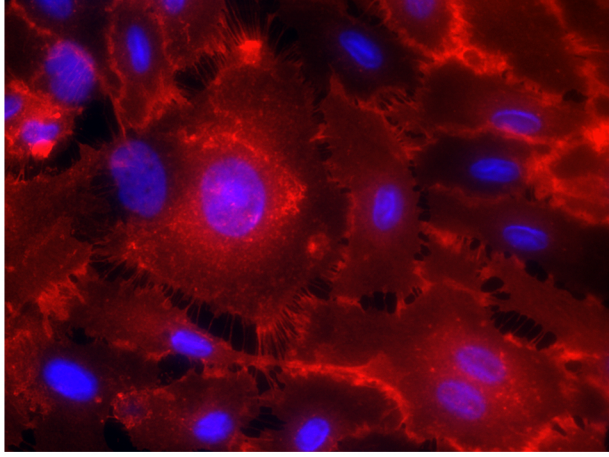

**Wnt5A**

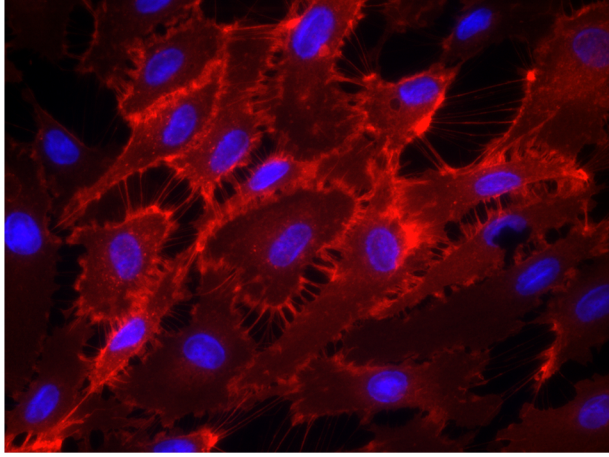

**TNF-alpha**

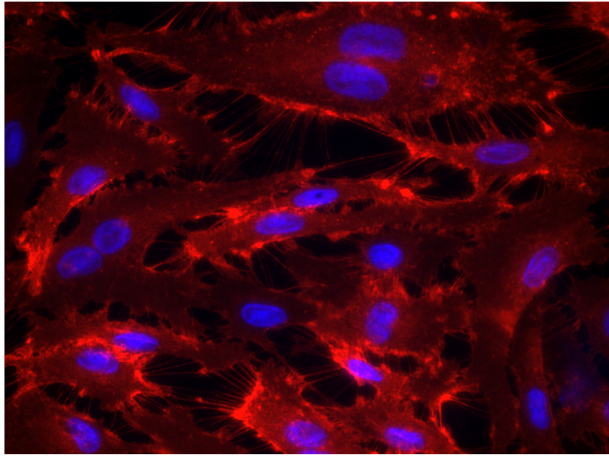

Supplement: MOESM1 [file 12300576]
