# Supplementary material for: WIF1 prevents Wnt5A mediated LIMK/CFL phosphorylation and adherens junction disruption in human vascular endothelial cells
Source: Springer Nature journal article supplement (doi:10.1186/s12950-017-0157-4), 2017-05-19
Supplement: MOESM4 [file 12300576]

1 **Additional file 4**

2 **Supplementary Methods**

3 **Endothelial barrier function analysis**

4 Endothelial barrier function in response to a specific stimulus can be measured in a fully  
5 standardized manner by continuously recording changes in trans-endothelial electric  
6 resistance using Electric Cell-substrate Impedance Sensing (ECIS) [1, 2]. The barrier  
7 function of HCAEC was recorded in real-time using the ECIS Z Theta system (Applied  
8 Biophysics) and the associated software v.1.2.126 PC, as described [3]. HCAEC seeded  
9 (80,000- 90,000 cells/well) into rat tail collagen type I coated and stabilized 8W10E+  
10 electrode chamber arrays were grown up to tight monolayer stage. Treatments were then  
11 carried out by replacing the medium with fresh medium without or with stimuli (Wnt5A,  
12 Wnt5A+sFRP1, Wnt5A+WIF1). The barrier function measurements were conducted in Ohms  
13 every 5 min at multiple frequencies ranging from 62.6 Hz to 64 kHz, normalized to its value  
14 at time zero, and plotted with respect to time. 40 electrodes present in each of the eight wells  
15 of 8W10E+ array traced the cells at 40 different locations in each well and the measurements  
16 were averaged.

17 **References**

- 18 1. Bernas MJ, Cardoso FL, Daley SK, Weinand ME, Campos AR, Ferreira AJG, Hoying  
19 JB, Witte MH, Brites D, Persidsky Y, et al. Establishment of primary cultures of  
20 human brain microvascular endothelial cells to provide an in vitro cellular model of  
21 the blood-brain barrier. *Nat Protocols*. 2010; 5:1265-1272.
- 22 2. Szulcek R, Bogaard HJ, van Nieuw Amerongen GP. Electric cell-substrate impedance  
23 sensing for the quantification of endothelial proliferation, barrier function, and  
24 motility. *J Vis Exp*. 2014.

1 3. Skaria T, Bachli E, Schoedon G. Wnt5A/Ryk signaling critically affects barrier  
2 function in human vascular endothelial cells. *Cell Adh Migr.* 2016:1-15.

3

4

5
